# Supplementary material for: Evaluation of the association of heterozygous germline variants in NTHL1 with breast cancer predisposition: an international multi-center study of 47,180 subjects
Source: PubMed Central journal article supplement (PMC8115524; doi:10.1038/s41523-021-00255-3), 2021-05-12
Supplement: 41523_2021_255_MOESM1_ESM.pdf [file 41523_2021_255_MOESM1_ESM.pdf]

## Supplementary Tables

**Supplementary Table 1. Personal and family history of *NTHL1* LoF variant carriers in BEACCON study.**

| Sample | Affected status | <i>NTHL1</i> variant    | Diagnosis (age of onset) of cases or age of controls   | No of breast cancer diagnosis in 1 <sup>st</sup> -degree relatives |
|--------|-----------------|-------------------------|--------------------------------------------------------|--------------------------------------------------------------------|
| C35612 | case            | p.Ser22AlafsTer5        | Breast(45, 60)                                         | 1                                                                  |
| C31266 | case            | p.Gln90Ter              | Ovary(53)                                              | 1                                                                  |
| C20960 | case            | p.Gln90Ter              | Breast(35)                                             | 1                                                                  |
| C21261 | case            | p.Gln90Ter              | Breast(56)                                             | 0                                                                  |
| C30667 | case            | p.Gln90Ter              | Breast(37)                                             | 0                                                                  |
| C21552 | case            | p.Gln90Ter <sup>1</sup> | Breast(47, 53), Bowel(42, 55), Bladder(52), Uterus(53) | 1                                                                  |
| C21570 | case            | p.Gln90Ter              | Breast(52)                                             | 1                                                                  |
| C30165 | case            | p.Gln90Ter              | Breast(54)                                             | 0                                                                  |
| C21835 | case            | p.Gln90Ter              | Breast(55), Ovary(54)                                  | 0                                                                  |
| C31362 | case            | p.Gln90Ter              | Breast(47)                                             | 1                                                                  |
| C35407 | case            | p.Gln90Ter              | Breast(38, 47)                                         | 0                                                                  |
| C35456 | case            | p.Gln90Ter              | Breast(68)                                             | 1                                                                  |
| C36876 | case            | p.Gln90Ter              | Breast(68), Skin, non-melanoma (age unknown)           | 2                                                                  |
| C37500 | case            | p.Gln90Ter              | Breast(30)                                             | 0                                                                  |
| C37696 | case            | p.Gln90Ter              | Breast(33)                                             | 0                                                                  |
| C36922 | case            | p.Gln90Ter              | Breast(45)                                             | 0                                                                  |
| C31544 | case            | p.Gln90Ter              | Peritoneal(62)                                         | NA                                                                 |
| C31956 | case            | p.Gln90Ter              | Breast(24)                                             | NA                                                                 |
| C32018 | case            | p.Gln90Ter              | Breast(57)                                             | NA                                                                 |
| C32110 | case            | p.Gln90Ter              | Ovary(58)                                              | NA                                                                 |
| C32170 | case            | p.Gln90Ter              | Breast(44)                                             | NA                                                                 |
| C32815 | case            | p.Gln90Ter              | Breast(55)                                             | NA                                                                 |
| C32819 | case            | p.Gln90Ter              | Breast(51)                                             | NA                                                                 |

| Sample | Affected status | <i>NTHL1</i> variant | Diagnosis (age of onset) of cases or age of controls | No of breast cancer diagnosis in 1 <sup>st</sup> -degree relatives |
|--------|-----------------|----------------------|------------------------------------------------------|--------------------------------------------------------------------|
| C33461 | case            | p.Gln90Ter           | Breast(39)                                           | 1                                                                  |
| C34180 | case            | p.Gln90Ter           | Breast(40)                                           | 1                                                                  |
| C34833 | case            | p.Gln90Ter           | Breast(31)                                           | 0                                                                  |
| N36632 | control         | p.Gln90Ter           | 56                                                   | 1                                                                  |
| N30349 | control         | p.Gln90Ter           | 64                                                   | 0                                                                  |
| N34375 | control         | p.Gln90Ter           | 62                                                   | 0                                                                  |
| N34388 | control         | p.Gln90Ter           | 58                                                   | 0                                                                  |
| N35792 | control         | p.Gln90Ter           | 66                                                   | 0                                                                  |
| N30392 | control         | p.Gln90Ter           | 59                                                   | 2                                                                  |
| N37007 | control         | p.Gln90Ter           | 64                                                   | 0                                                                  |
| N33080 | control         | p.Gln90Ter           | 58                                                   | 0                                                                  |
| N35136 | control         | p.Gln90Ter           | 56                                                   | 1                                                                  |
| N33892 | control         | p.Gln90Ter           | 60                                                   | 0                                                                  |
| N37075 | control         | p.Gln90Ter           | 64                                                   | 1                                                                  |
| C30797 | case            | p.Arg129ThrfsTer42   | Breast(31)                                           | 0                                                                  |
| N33902 | control         | p.Tyr130Ter          | 81                                                   | 0                                                                  |
| N35337 | control         | p.Tyr130Ter          | 58                                                   | 1                                                                  |
| C33562 | case            | p.Arg153Ter          | Breast(42)                                           | NA                                                                 |
| C34178 | case            | p.Arg153Ter          | Breast(age unknown), Ovary(83)                       | 0                                                                  |
| C34086 | case            | p.Lys254Ter          | Breast(51), Ovary(age unknown)                       | NA                                                                 |
| C31264 | case            | p.Gln287Ter          | Breast(51)                                           | 0                                                                  |
| C21256 | case            | p.Gln287Ter          | Breast(57)                                           | 1                                                                  |
| C20188 | case            | p.Gln287Ter          | Breast(51), Mouth(46, 59)                            | 2                                                                  |
| C21809 | case            | p.Gln287Ter          | Breast(36)                                           | 1                                                                  |
| C21298 | case            | p.Gln287Ter          | Breast(28)                                           | 1                                                                  |
| C37112 | case            | p.Gln287Ter          | Breast(49)                                           | 1                                                                  |
| C32774 | case            | p.Gln287Ter          | Ovary(68)                                            | 1                                                                  |

| Sample | Affected status | <i>NTHL1</i> variant | Diagnosis (age of onset) of cases or age of controls | No of breast cancer diagnosis in 1 <sup>st</sup> -degree relatives |
|--------|-----------------|----------------------|------------------------------------------------------|--------------------------------------------------------------------|
| C33342 | case            | p.Gln287Ter          | Breast(28)                                           | NA                                                                 |
| C33351 | case            | p.Gln287Ter          | Breast(41)                                           | 0                                                                  |
| N35940 | control         | p.Gln287Ter          | 69                                                   | 0                                                                  |
| N33964 | control         | p.Gln287Ter          | 50                                                   | 0                                                                  |

<sup>1</sup> homozygous variant

**Supplementary Table 2. Missense variants of *NTHL1* identified in cases and controls in BEACCON study.**

| CDS change <sup>1</sup> | Protein change <sup>2</sup> | Case | Control | Exon (of 6) | dbSNP ID    | Condel | PolyPhen2 | SIFT  | CADD  | REVEL | GnomAD <sup>3</sup> |
|-------------------------|-----------------------------|------|---------|-------------|-------------|--------|-----------|-------|-------|-------|---------------------|
| c.5G>A                  | p.Cys2Tyr                   | 1    | 0       | 1           | .           | Neu    | Benign    | Dele  | 13.98 | 0.03  | 0                   |
| c.31G>T                 | p.Ala11Ser                  | 0    | 1       | 1           | .           | Neu    | Benign    | Toler | 10.07 | 0.02  | 9.80E-06            |
| c.53C>G                 | p.Thr18Ser                  | 2    | 1       | 1           | .           | Neu    | Benign    | Dele  | 15.69 | 0.08  | 1.55E-04            |
| c.55C>T                 | p.Arg19Trp                  | 2    | 1       | 1           | .           | Dele   | Prob Dam  | Dele  | 17.03 | 0.20  | 3.03E-05            |
| c.61C>T                 | p.Arg21Trp                  | 3    | 2       | 1           | rs3087469   | Neu    | Benign    | Toler | 13.62 | 0.12  | 5.68E-05            |
| c.68T>C                 | p.Leu23Pro                  | 2    | 2       | 1           | .           | Neu    | Benign    | Toler | 13.04 | 0.10  | 1.93E-04            |
| c.98G>A                 | p.Arg33Lys                  | 1    | 0       | 1           | rs2302172   | Neu    | Benign    | Toler | 9.73  | 0.04  | 4.44E-04            |
| c.118C>T                | p.Arg40Trp                  | 1    | 0       | 1           | .           | Neu    | Benign    | Dele  | 13.90 | 0.05  | 0                   |
| c.125G>A                | p.Arg42Lys                  | 1    | 0       | 1           | .           | Neu    | Benign    | Toler | 14.94 | 0.02  | 5.26E-06            |
| c.257T>C                | p.Val86Ala                  | 1    | 0       | 2           | .           | Neu    | Benign    | Toler | 9.86  | 0.01  | 0                   |
| c.276G>C                | p.Trp92Cys                  | 0    | 1       | 2           | .           | Dele   | Prob Dam  | Dele  | 19.03 | 0.54  | 1.86E-05            |
| c.298C>T                | p.Arg100Cys                 | 19   | 14      | 2           | rs148104494 | Dele   | Prob Dam  | Dele  | 17.06 | 0.74  | 9.17E-04            |
| c.368C>T                | p.Ala123Val                 | 0    | 1       | 2           | .           | Neu    | Benign    | Toler | 16.47 | 0.09  | 2.96E-05            |
| c.373C>T                | p.Pro125Ser                 | 0    | 1       | 2           | rs149277519 | Dele   | Poss Dam  | Toler | 10.24 | 0.63  | 7.10E-05            |
| c.469C>T                | p.Arg157Trp                 | 1    | 0       | 3           | .           | Neu    | Benign    | Toler | 13.78 | 0.40  | 1.87E-05            |

| CDS change <sup>1</sup> | Protein change <sup>2</sup> | Case | Control | Exon (of 6) | dbSNP ID    | Condel | PolyPhen2 | SIFT  | CADD  | REVEL | GnomAD <sup>3</sup> |
|-------------------------|-----------------------------|------|---------|-------------|-------------|--------|-----------|-------|-------|-------|---------------------|
| c.470G>C                | p.Arg157Pro                 | 1    | 0       | 3           | .           | Dele   | Poss Dam  | Dele  | 16.82 | 0.60  | 7.64E-05            |
| c.479C>T                | p.Thr160Met                 | 0    | 1       | 3           | .           | Dele   | Prob Dam  | Dele  | 21.10 | 0.79  | 4.49E-05            |
| c.512C>T                | p.Thr171Met                 | 1    | 0       | 3           | .           | Neu    | Benign    | Toler | 11.24 | 0.42  | 1.70E-05            |
| c.517G>A                | p.Gly173Ser                 | 1    | 0       | 3           | .           | Dele   | Prob Dam  | Dele  | 22.90 | 0.67  | 0                   |
| c.527T>C                | p.Ile176Thr                 | 18   | 13      | 3           | rs1805378   | Dele   | Prob Dam  | Dele  | 18.50 | 0.88  | 1.81E-03            |
| c.554A>G                | p.Lys185Arg                 | 2    | 0       | 4           | .           | Dele   | Prob Dam  | Dele  | 21.50 | 0.90  | 4.24E-06            |
| c.601G>A                | p.Gly201Ser                 | 1    | 0       | 4           | rs200007034 | Neu    | Benign    | Toler | 12.02 | 0.05  | 2.99E-05            |
| c.607G>A                | p.Asp203Asn                 | 1    | 0       | 4           | .           | Dele   | Prob Dam  | Dele  | 24.40 | 0.27  | 1.87E-05            |
| c.610A>C                | p.Ile204Leu                 | 1    | 0       | 4           | .           | Dele   | Prob Dam  | Dele  | 20.50 | 0.23  | 0                   |
| c.676A>G                | p.Met226Val                 | 3    | 1       | 4           | .           | Dele   | Prob Dam  | Dele  | 13.84 | 0.77  | 9.78E-05            |
| c.737C>T                | p.Ala246Val                 | 1    | 0       | 5           | .           | Neu    | Benign    | Toler | 13.28 | 0.52  | 4.22E-06            |
| c.748A>G                | p.Arg250Gly                 | 1    | 0       | 5           | .           | Neu    | Benign    | Toler | 0.01  | 0.31  | 0                   |
| c.770A>G                | p.Lys257Arg                 | 2    | 3       | 5           | .           | Neu    | Benign    | Toler | 6.97  | 0.21  | 9.69E-05            |
| c.772T>A                | p.Ser258Thr                 | 3    | 1       | 5           | rs199698117 | Neu    | Benign    | Toler | 0.01  | 0.15  | 8.20E-05            |
| c.787C>T                | p.Arg263Cys                 | 1    | 0       | 5           | .           | Dele   | Prob Dam  | Dele  | 12.97 | 0.52  | 5.59E-05            |
| c.828C>G                | p.His276Gln                 | 0    | 2       | 6           | .           | Neu    | Benign    | Toler | 0.01  | 0.29  | 0                   |
| c.847G>A                | p.Val283Met                 | 1    | 0       | 6           | .           | Dele   | Prob Dam  | Dele  | 16.85 | 0.80  | 4.27E-06            |

| CDS change <sup>1</sup> | Protein change <sup>2</sup> | Case | Control | Exon (of 6) | dbSNP ID    | Condel | PolyPhen2 | SIFT  | CADD  | REVEL | GnomAD <sup>3</sup> |
|-------------------------|-----------------------------|------|---------|-------------|-------------|--------|-----------|-------|-------|-------|---------------------|
| c.856G>A                | p.Gly286Ser                 | 1    | 0       | 6           | rs139309757 | Dele   | Prob Dam  | Dele  | 24.20 | 0.97  | 3.77E-05            |
| c.878T>C                | p.Val293Ala                 | 0    | 1       | 6           | .           | Neu    | Benign    | Dele  | 11.80 | 0.31  | 0                   |
| c.886C>T                | p.Arg296Cys                 | 1    | 0       | 6           | .           | Dele   | Poss Dam  | Dele  | 18.52 | 0.79  | 0                   |
| c.895G>A                | p.Ala299Thr                 | 1    | 0       | 6           | .           | Neu    | Benign    | Toler | 9.37  | 0.29  | 0                   |
| c.935T>C                | p.Leu312Pro                 | 1    | 1       | 6           | .           | Dele   | Poss Dam  | Dele  | 14.05 | 0.05  | 0                   |

<sup>1</sup> ENST00000219066.1(NM\_002528.5); Neu, neutral; Dele, deleterious; Prob Dam, probably damaging; Poss Dam, possibly damaging; Toler, tolerated;

<sup>2</sup> ENSP00000219066.1(NP\_002519.1);

<sup>3</sup> GnomAD, minor allele frequency in non-cancer cohorts in GnomAD database. One case carrier harbored two variants: p.Arg19Trp and p.Arg100Cys.

**Supplementary Table 3. Overall and likely pathogenic missense variants of *NTHL1* filtered by population frequency and *in silico* prediction tools in cases and controls in BEACCON study**

| <i>NTHL1</i> missense variants  | Case n = 4985 |      | Control n = 4786 |      | OR   | CI        | P    |
|---------------------------------|---------------|------|------------------|------|------|-----------|------|
|                                 | Carriers      | %    | Carriers         | %    |      |           |      |
| Overall unselected <sup>1</sup> | 75            | 1.50 | 47               | 0.98 | 1.54 | 1.05-2.27 | 0.02 |
| Rare (MAF ≤ 0.001) <sup>2</sup> | 39            | 0.78 | 20               | 0.42 | 1.88 | 1.07-3.41 | 0.03 |
| Condel (deleterious)            | 52            | 1.04 | 33               | 0.69 | 1.52 | 0.96-2.43 | 0.06 |
| PolyPhen2 (damaging)            | 52            | 1.04 | 31               | 0.65 | 1.62 | 1.02-2.62 | 0.04 |
| SIFT (deleterious)              | 56            | 1.12 | 34               | 0.71 | 1.59 | 1.02-2.51 | 0.03 |
| CADD (≥10)                      | 66            | 1.32 | 41               | 0.86 | 1.55 | 1.03-2.36 | 0.03 |
| REVEL (≥0.75)                   | 26            | 0.52 | 15               | 0.31 | 1.67 | 0.85-3.39 | 0.12 |

<sup>1</sup> Includes all the missense variants identified in *NTHL1* without any population frequency filters or *in silico* prediction filters.

<sup>2</sup> MAF, minor allele frequency in gnomAD database.

**Supplementary Table 4. Histo-pathological subtypes and Hormone receptor status of the breast cancers derived from heterozygous and homozygous LoF *NTHL1* variant carriers.**

*Het*, heterozygous variant; *Null*, homozygous variant; *IDC*, invasive ductal carcinoma; *ILC*, invasive lobular carcinoma; *ER*, oestrogen receptor; *PR*, progesterone receptor; *HER2*, human epidermal growth factor receptor 2. *NA*, not available.

| Sample | <i>NTHL1</i> status | Age of diagnosis | Laterality | Histological subtype | Grade | ER  | PR  | HER2  |
|--------|---------------------|------------------|------------|----------------------|-------|-----|-----|-------|
| C20960 | Het                 | 35               | Right      | IDC                  | G3    | ER+ | PR+ | HER2- |
| C21256 | Het                 | 57               | Right      | IDC                  | G2    | ER+ | NA  | HER2- |
| C21261 | Het                 | 56               | Right      | IDC                  | G3    | ER+ | PR+ | HER2- |
| C20188 | Het                 | 51               | Right      | IDC                  | G3    | ER- | PR- | HER2- |
| C30667 | Het                 | 37               | Left       | IDC                  | G2    | ER- | PR+ | HER2+ |
| C21809 | Het                 | 36               | Left       | IDC                  | G2    | ER+ | PR+ | HER2+ |
| C21298 | Het                 | 28               | Right      | IDC (Medullary)      | NA    | ER- | PR+ | NA    |
| C30165 | Het                 | 54               | Left       | IDC                  | G3    | ER- | PR- | HER2- |

|        |      |    |       |                 |    |     |     |       |
|--------|------|----|-------|-----------------|----|-----|-----|-------|
| C21835 | Het  | 55 | NA    | IDC             | G2 | ER+ | PR+ | HER2- |
| C30797 | Het  | 31 | Right | IDC             | G2 | ER+ | PR+ | HER2+ |
| C37112 | Het  | 49 | Right | IDC             | G2 | ER+ | PR+ | HER2- |
| C31362 | Het  | 47 | Right | IDC             | G2 | ER+ | PR+ | HER2- |
| C35407 | Het  | 38 | Left  | IDC             | G1 | ER+ | PR+ | HER2- |
| C35407 | Het  | 47 | NA    | IDC             | G3 | ER- | PR- | HER2- |
| C35456 | Het  | 68 | Right | IDC             | G2 | ER+ | PR+ | HER2- |
| C35612 | Het  | 45 | Right | IDC             | G3 | ER- | PR+ | NA    |
| C35612 | Het  | 60 | Left  | IDC             | G3 | ER- | PR- | HER2- |
| C36876 | Het  | 68 | Right | IDC (Mucinous)  | G2 | ER+ | PR+ | HER2- |
| C37500 | Het  | 30 | Left  | IDC             | G2 | ER+ | PR+ | HER2- |
| C37696 | Het  | 33 | Left  | IDC             | G2 | ER+ | PR+ | HER2- |
| C36922 | Het  | 45 | Right | IDC (Medullary) | G3 | ER- | PR- | HER2- |
| C21552 | Null | 47 | Left  | ILC             | G2 | ER+ | PR+ | HER2- |
| C21552 | Null | 53 | Right | IDC             | G2 | ER+ | PR+ | HER2- |

---



**Supplementary Table 5. Subjects and cohorts ascertain standard, sequencing method and coverage information for the ten multi-center international studies.**

| Study                                                                                                  | Case ascertain standard <sup>1</sup> | Country of origin | N. of cases | N. of controls | Sequencing method                                                                             | Case 10x coverage (Depth) | Control 10x coverage (Depth) |
|--------------------------------------------------------------------------------------------------------|--------------------------------------|-------------------|-------------|----------------|-----------------------------------------------------------------------------------------------|---------------------------|------------------------------|
| BEACCON, hereditary BrEAst Case CONTROL study                                                          | Hereditary                           | Australia         | 4,985       | 4,786          | Targeted sequencing (HaloPlex HS Targeted Enrichment Assay, Agilent Technologies)             | 99.32% (396.13)           | 99.19% (358.64)              |
| GC-HBOC, German Consortium for Hereditary Breast and Ovarian Cancer                                    | Hereditary                           | Germany           | 3,199       | 2,767          | Targeted sequencing (Agilent SureSelect QXT target Enrichment assay (Agilent Technologies)    | 98.85% (193.08)           | 98.88% (205,24)              |
| GENESIS, French familial BRCAx                                                                         | Hereditary                           | France            | 1,207       | 1,199          | Targeted sequencing (SureSelect target Enrichment system, Agilent Technologies <sup>2</sup> ) | 99.6% (223.21)            | 99.6% (224,98)               |
| DFBBCS, the Dutch Familial Bilateral Breast Cancer Study                                               | Hereditary                           | Netherland        | 1,012       | 962            | Targeted sequencing (Agilent SureSelect QXT target Enrichment assay (Agilent Technologies)    | 98.78% (382,31)           | 98.82% (348,30)              |
| VHIO, familial breast cancer and control study of the Vall d'Hebron Institute of Oncology of Barcelona | Hereditary                           | Spain             | 1,012       | 488            | Targeted sequencing (Hi-Plex <sup>3</sup> )                                                   | 94.44% (1186)             | 92.86% (1097)                |
| OFBCR, Ontario Familial Breast Cancer Registry                                                         | Hereditary                           | Canada,Ontario    | 600         | 592            | Targeted sequencing (Agilent SureSelect QXT target Enrichment assay (Agilent Technologies)    | 98.67% (355,76)           | 98.74% (294,88)              |

|                                                              |                            |                                      |        |       |                                                                                                                                            |                    |                    |
|--------------------------------------------------------------|----------------------------|--------------------------------------|--------|-------|--------------------------------------------------------------------------------------------------------------------------------------------|--------------------|--------------------|
| SEARCH, UK<br>Population-based Breast<br>Cancer Study        | Population-<br>based       | United Kingdom                       | 12,523 | 6,474 | Targeted sequencing (Fluidigm Juno<br>Access Array)                                                                                        | 94.51%<br>(171.41) | 95.01%<br>(152.21) |
| ABCFR, Australian<br>Breast Cancer Family<br>Registry        | Population-<br>based cases | Australia                            | 1,421  | 833   | Targeted sequencing (HaloPlex HS<br>Targeted Enrichment Assay, Agilent<br>Technologies)<br><br>Targeted sequencing (Hi-Plex <sup>3</sup> ) | 99.73%<br>(474)    | 98.47%<br>(2470)   |
| HABC, Hispanic<br>American Breast Cancer<br>study            | Mostly<br>Hereditary       | USA(Hispanic American)               | 1,045  | 1,189 | Whole exome sequencing                                                                                                                     | NA                 | NA                 |
| CARTaGENE, Québec<br>Population-based Breast<br>Cancer Study | Population-<br>based       | Canada, Québec (French-<br>Canadian) | 451    | 469   | Targeted sequencing (Agilent<br>SureSelect QXT target Enrichment<br>assay (Agilent Technologies)                                           | 98,35%<br>(312,90) | 98,57%<br>(287,32) |

<sup>1</sup> case ascertain standards included hereditary, the case subjects in the study were predominantly ascertained in different standard to enrich for high-risk breast cancer patients and population-based, the case subjects were recruited in relevant population without consideration of enrichment for family history.

<sup>2</sup> Girard, E. et al. Familial breast cancer and DNA repair genes: Insights into known and novel susceptibility genes from the GENESIS study, and implications for multigene panel testing. *Int J Cancer*, doi:10.1002/ijc.31921 (2018).

<sup>3</sup> Hammet, F. et al. Hi-Plex2: a simple and robust approach to targeted sequencing-based genetic screening. *Biotechniques* 67, 118-122, doi:10.2144/btn-2019-0026 (2019).









|          |             |             |          |   |   |   |   |   |   |   |   |   |   |   |   |   |   |   |   |   |   |   |   |   |   |          |          |
|----------|-------------|-------------|----------|---|---|---|---|---|---|---|---|---|---|---|---|---|---|---|---|---|---|---|---|---|---|----------|----------|
| c.828C>G | p.His276Gln | -           | Missense | 0 | 2 | 0 | 2 | 0 | 0 | 0 | 0 | 0 | 0 | 0 | 0 | 0 | 0 | 0 | 0 | 0 | 0 | 0 | 0 | 0 | 0 | 0        |          |
| c.830A>T | p.Glu277Val | rs369032190 | Missense | 1 | 0 | 0 | 0 | 0 | 0 | 0 | 0 | 0 | 0 | 0 | 0 | 0 | 0 | 0 | 1 | 0 | 0 | 0 | 0 | 0 | 0 | 4.27E-06 | 9.90E-06 |
| c.836A>G | p.Asn279Ser | rs149287105 | Missense | 1 | 0 | 0 | 0 | 0 | 0 | 0 | 0 | 0 | 0 | 0 | 0 | 0 | 1 | 0 | 0 | 0 | 0 | 0 | 0 | 0 | 0 | 8.53E-06 | 0        |
| c.841C>T | p.Leu281Phe | rs939350999 | Missense | 1 | 0 | 0 | 0 | 1 | 0 | 0 | 0 | 0 | 0 | 0 | 0 | 0 | 0 | 0 | 0 | 0 | 0 | 0 | 0 | 0 | 0 | 0        | 0        |
| c.847G>A | p.Val283Met | rs759411504 | Missense | 2 | 0 | 1 | 0 | 0 | 0 | 0 | 0 | 0 | 0 | 0 | 0 | 0 | 1 | 0 | 0 | 0 | 0 | 0 | 0 | 0 | 0 | 4.27E-06 | 9.87E-06 |
| c.856G>A | p.Gly286Ser | rs139309757 | Missense | 5 | 1 | 1 | 0 | 2 | 1 | 0 | 0 | 0 | 0 | 0 | 0 | 0 | 2 | 0 | 0 | 0 | 0 | 0 | 0 | 0 | 0 | 3.77E-05 | 4.28E-05 |
| c.878T>C | p.Val293Ala | -           | Missense | 0 | 1 | 0 | 1 | 0 | 0 | 0 | 0 | 0 | 0 | 0 | 0 | 0 | 0 | 0 | 0 | 0 | 0 | 0 | 0 | 0 | 0 | 0        | 0        |
| c.886C>T | p.Arg296Cys | rs571813695 | Missense | 1 | 1 | 1 | 0 | 0 | 0 | 0 | 0 | 0 | 0 | 0 | 0 | 0 | 0 | 1 | 0 | 0 | 0 | 0 | 0 | 0 | 0 | 0        | 0        |
| c.895G>A | p.Ala299Thr | rs763568491 | Missense | 1 | 0 | 1 | 0 | 0 | 0 | 0 | 0 | 0 | 0 | 0 | 0 | 0 | 0 | 0 | 0 | 0 | 0 | 0 | 0 | 0 | 0 | 0        | 0        |
| c.901C>A | p.Leu301Ile | -           | Missense | 1 | 0 | 0 | 0 | 1 | 0 | 0 | 0 | 0 | 0 | 0 | 0 | 0 | 0 | 0 | 0 | 0 | 0 | 0 | 0 | 0 | 0 | 0        | 0        |
| c.906C>G | p.Asn302Lys | rs759356343 | Missense | 0 | 1 | 0 | 0 | 0 | 0 | 0 | 0 | 0 | 0 | 0 | 0 | 0 | 0 | 1 | 0 | 0 | 0 | 0 | 0 | 0 | 0 | 4.34E-06 | 9.82E-06 |
| c.920C>T | p.Pro307Leu | rs367629024 | Missense | 1 | 0 | 0 | 0 | 0 | 0 | 0 | 0 | 0 | 0 | 1 | 0 | 0 | 0 | 0 | 0 | 0 | 0 | 0 | 0 | 0 | 0 | 7.68E-06 | 1.71E-05 |
| c.925G>A | p.Ala309Thr | -           | Missense | 1 | 1 | 0 | 0 | 0 | 1 | 0 | 0 | 0 | 0 | 0 | 0 | 0 | 1 | 0 | 0 | 0 | 0 | 0 | 0 | 0 | 0 | 4.38E-06 | 0        |
| c.935T>C | p.Leu312Pro | -           | Missense | 1 | 1 | 1 | 1 | 0 | 0 | 0 | 0 | 0 | 0 | 0 | 0 | 0 | 0 | 0 | 0 | 0 | 0 | 0 | 0 | 0 | 0 | 0        | 0        |

<sup>1</sup> ENSP00000219066.1 (NM\_002528.5)

<sup>2</sup> ENST00000219066.1 (NP\_002519.1)

<sup>3</sup> One case had a homozygous p.Gln90Ter variant and one case harbored two missense variants (p.Arg19Trp and p.Arg100Cys) in BEACCON study.

**Supplementary Table 7. List of all primers used in *NTHL1* variants validation and promoter methylation analysis.**

| Primer ID   | Sequence                                      | Experiment           |
|-------------|-----------------------------------------------|----------------------|
| NTHL1_ex1   | CCGGGATGTGTAGTCCGC(Forward)                   | Variants validation  |
|             | CTATCCCGCCTCCTCCCA(Reverse)                   |                      |
| NTHL1_ex3A  | CTCAAGTGTGGCCCAGGG(Forward)                   | Variants validation  |
|             | GGCTCACCTCCAGAAACC(Reverse)                   |                      |
| NTHL1_ex5   | GGAGTGTGCCCTGTTCA(Forward)                    | Variants validation  |
|             | GCTCTTCTCCCTAGGAAGCC(Reverse)                 |                      |
| NTHL1_ex4   | AGCTTGACACGTCCTCA(Forward)                    | Variants validation  |
|             | GAATCCCAAGAGCAGCCAGT(Reverse)                 |                      |
| NTHL1_ex6   | GTGGCTGCCTAGGTATGAGT(Forward)                 | Variants validation  |
|             | AAAGCCACTTCACAGACGGT(Reverse)                 |                      |
| NTHL1_ex2   | CACCCCTACCCTACCTCAC(Forward)                  | Variants validation  |
|             | GGCACTGGAGTCATAGCAGT(Reverse)                 |                      |
| NTHL1_ex3   | CACAAGCAGGTACGCAGGTA(Forward)                 | Variants validation  |
|             | CCTGAGATGCTTGACCCTCA(Reverse)                 |                      |
| NTHL1_methy | GGAAAGTTYGGGAGATATTAGGTTTGGTTTAGAGAG(Forward) | Promoter methylation |
|             | AAACTCCRAACATCCCTTAATTTTAAATCATAAC(Reverse)   |                      |



## Supplementary Figures

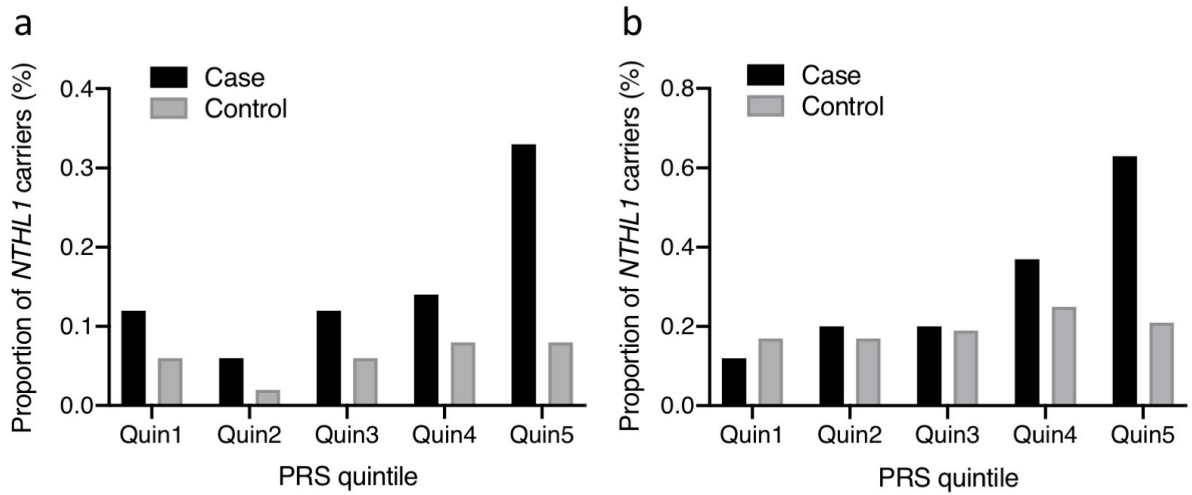

**Supplementary Figure 1. The distribution of the cases and controls carrying a *NTHL1* LoF variant (a) or a *NTHL1* missense variant (b) in PRS quintiles (according to all controls in the BEACCON study).**

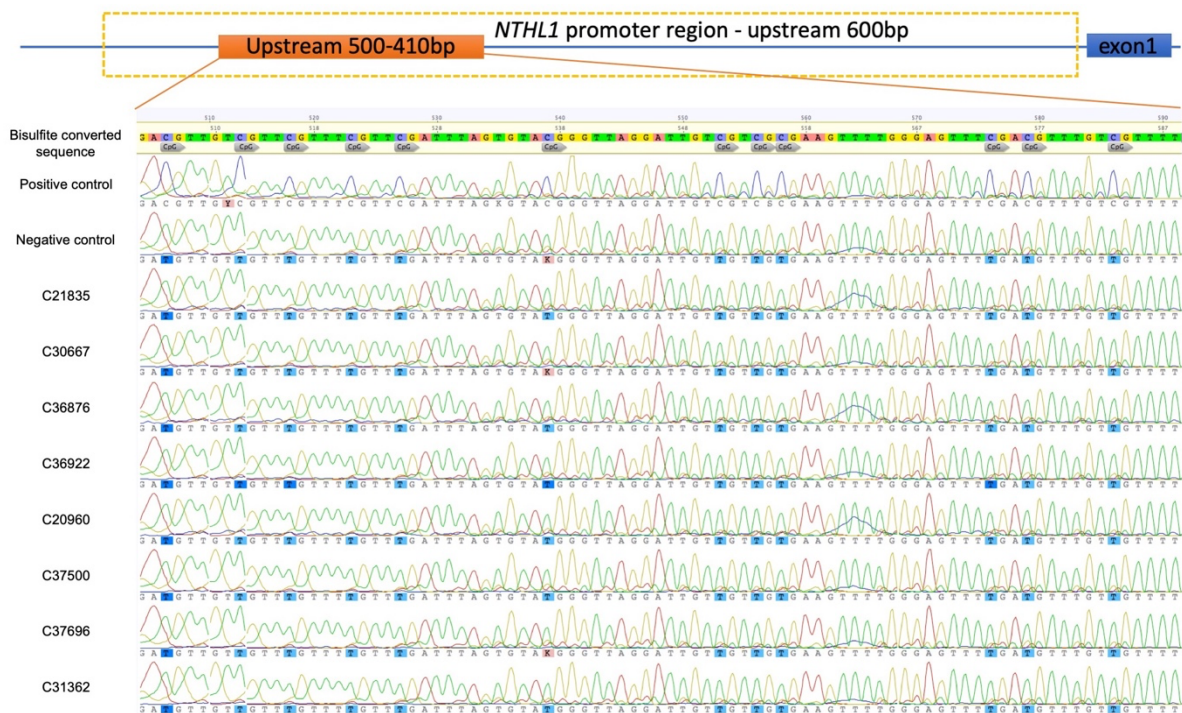

Supplementary Figure 2. *NTHL1* promoter methylation sequencing.

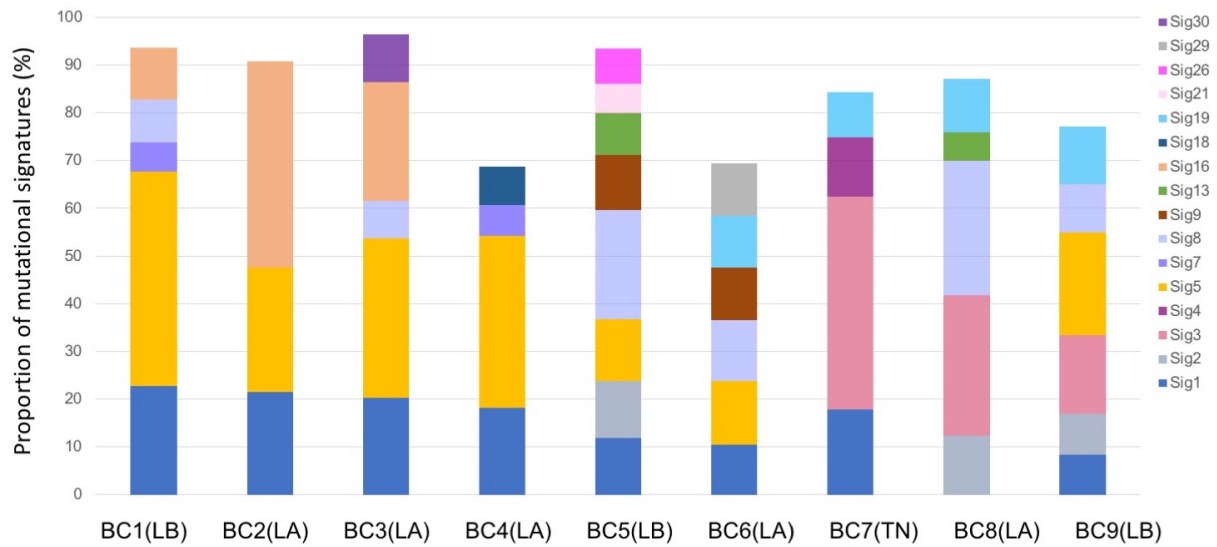

**Supplementary Figure 3. Mutational signatures of 11 sporadic breast cancers lacking *NTHL1* germline variants.**

*One tumour (BC3) demonstrated a minor fraction of signature 30. LB, luminal B breast cancer; LA luminal A breast cancer; TN, triple-negative breast cancer.*

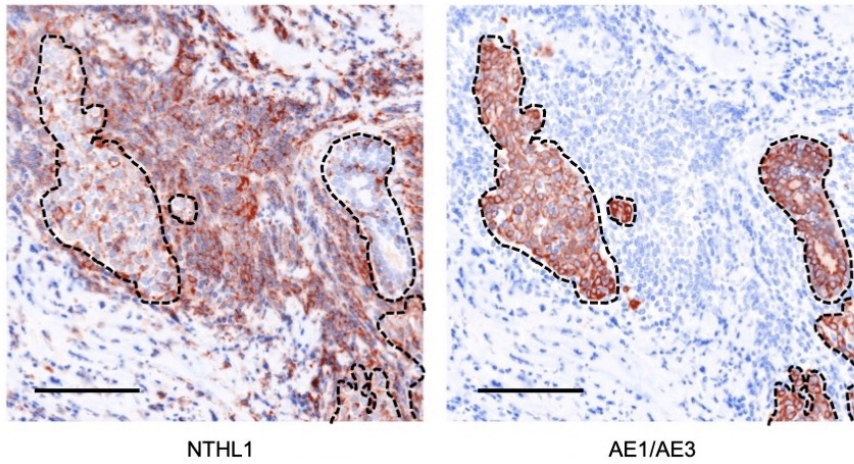

**Supplementary Figure 4. NTHL1 staining in breast cancer cells and the surrounding stroma and immune cells in an *NTHL1*-het breast tumour.**

*Left: NTHL1 staining. NTHL1: brown color; DAPI: blue color; right: AE1/AE3 staining served as a cancer cell marker. AE1/AE3: brown color; DAPI: blue color. The fluorescence signal was converted as colorimetric pattern for display. Scale bar = 100  $\mu$ m.*

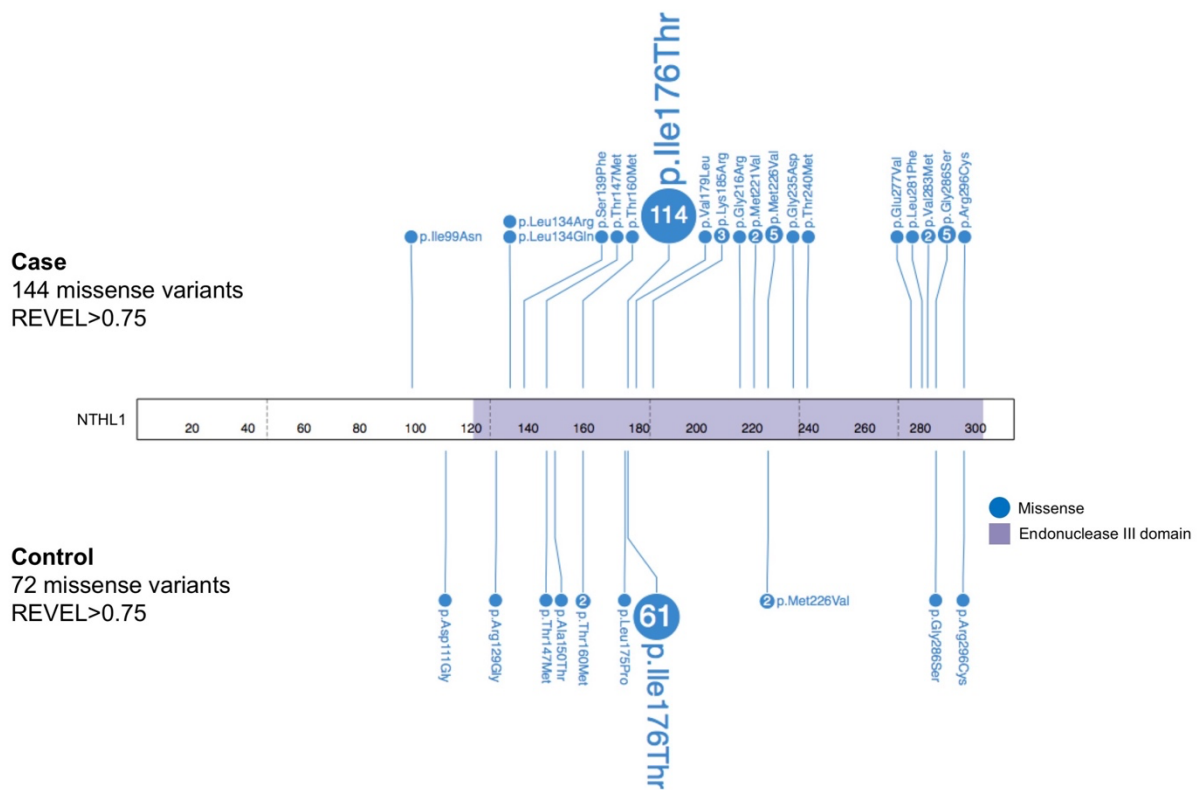

**Supplementary Figure 5. Lollipop plot of missense variants with a REVEL score > 0.75 identified in 27,421 cases and 19,759 controls.**
